# Supplementary material for: Seasonal Variations and Interspecific Differences in Metabolomes of Freshwater Fish Tissues: Quantitative Metabolomic Profiles of Lenses and Gills
Source: MDPI journal article supplement (doi:10.3390/metabo9110264), 2019-11-02
Supplement: s1 [file s1]

## Supplementary Information

for

### Quantitative metabolomic profiling of lenses and gills of freshwater fish *Sander lucioperca* and *Rutilus rutilus lacustris*

Yuri P. Tsentalovich<sup>1,2</sup>, Vadim V. Yanshole<sup>1,2</sup>, Lyudmila V. Yanshole<sup>1,2</sup>, Ekaterina A. Zelentsova<sup>1,2</sup>, Arsenty D. Melnikov<sup>1,2</sup>, Renad Z. Sagdeev<sup>1,2</sup>

<sup>1</sup>International Tomography Center SB RAS, Institutskaya 3a, Novosibirsk 630090, Russia

<sup>2</sup>Novosibirsk State University, Pirogova 2, Novosibirsk 630090, Russia

\*e-mail: [yura@tomo.nsc.ru](mailto:yura@tomo.nsc.ru)

#### Table of content

Supplementary Table S1. Characterization of fish lenses and gills used in this study.

Supplementary Figure S1. NMR spectrum of NMR spectrum of serine phosphoethanolamine (Ser-PETA).

Supplementary Figure S2. NMR spectrum of threonine phosphoethanolamine (Thr-PETA).

Supplementary Figure S3. ESI-Q-TOF mass-spectrum of CID fragments (MS/MS) of isolated parent ion with m/z 229.0586 (Ser-PETA).

Supplementary Figure S4. ESI-Q-TOF mass-spectrum of CID fragments (MS/MS) of isolated parent ion with m/z 243.0737 (Thr-PETA).

**Supplementary Table S1.** Characterization of fish lenses and gills used in this study.

| Sample Number | Fish Type                   | Date of catching | State of water area | Lens weight, mg | Gills weight, mg |
|---------------|-----------------------------|------------------|---------------------|-----------------|------------------|
| Group 1       |                             |                  |                     |                 |                  |
| SA1           | <i>S. lucioperca</i>        | 10.10.2017       | Open water          | 158             | -                |
| SA2           | <i>S. lucioperca</i>        | 10.10.2017       | Open water          | 154             | -                |
| SA3           | <i>S. lucioperca</i>        | 10.10.2017       | Open water          | 94              | -                |
| SA4           | <i>S. lucioperca</i>        | 10.10.2017       | Open water          | 75              | -                |
| SA5           | <i>S. lucioperca</i>        | 10.10.2017       | Open water          | 135             | -                |
| SA6           | <i>S. lucioperca</i>        | 10.10.2017       | Open water          | 94              | -                |
| SA7           | <i>S. lucioperca</i>        | 10.10.2017       | Open water          | 79              | -                |
| SA8           | <i>S. lucioperca</i>        | 10.10.2017       | Open water          | 140             | -                |
| Group 2       |                             |                  |                     |                 |                  |
| SW1           | <i>S. lucioperca</i>        | 02.02.2018       | Ice                 | 98              | 92               |
| SW2           | <i>S. lucioperca</i>        | 02.02.2018       | Ice                 | 79              | 116              |
| SW3           | <i>S. lucioperca</i>        | 02.02.2018       | Ice                 | 78              | 85               |
| SW4           | <i>S. lucioperca</i>        | 02.02.2018       | Ice                 | 109             | 89               |
| SW5           | <i>S. lucioperca</i>        | 02.02.2018       | Ice                 | 114             | 124              |
| SW6           | <i>S. lucioperca</i>        | 02.02.2018       | Ice                 | 80              | 63               |
| SW7           | <i>S. lucioperca</i>        | 02.02.2018       | Ice                 | 73              | -                |
| Group 3       |                             |                  |                     |                 |                  |
| RA1           | <i>R. rutilus lacustris</i> | 28.11.2017       | Ice                 | 47              | -                |
| RA2           | <i>R. rutilus lacustris</i> | 28.11.2017       | Ice                 | 33              | -                |
| RA3           | <i>R. rutilus lacustris</i> | 28.11.2017       | Ice                 | 49              | -                |
| RA4           | <i>R. rutilus lacustris</i> | 28.11.2017       | Ice                 | 42              | -                |
| RA5           | <i>R. rutilus lacustris</i> | 28.11.2017       | Ice                 | 35              | -                |
| RA6           | <i>R. rutilus lacustris</i> | 28.11.2017       | Ice                 | 32              | -                |
| RA7           | <i>R. rutilus lacustris</i> | 28.11.2017       | Ice                 | 49              | -                |
| RA8           | <i>R. rutilus lacustris</i> | 28.11.2017       | Ice                 | 35              | -                |
| RA9           | <i>R. rutilus lacustris</i> | 28.11.2017       | Ice                 | 38              | -                |
| RA10          | <i>R. rutilus lacustris</i> | 28.11.2017       | Ice                 | 43              | -                |
| Group 4       |                             |                  |                     |                 |                  |
| RW1           | <i>R. rutilus lacustris</i> | 09.02.2018       | Ice                 | 35              | 82               |
| RW2           | <i>R. rutilus lacustris</i> | 09.02.2018       | Ice                 | 35              | 84               |
| RW3           | <i>R. rutilus lacustris</i> | 09.02.2018       | Ice                 | 42              | 135              |
| RW4           | <i>R. rutilus lacustris</i> | 09.02.2018       | Ice                 | 34              | 220              |
| RW5           | <i>R. rutilus lacustris</i> | 09.02.2018       | Ice                 | 34              | 60               |
| RW6           | <i>R. rutilus lacustris</i> | 09.02.2018       | Ice                 | -               | 130              |
| RW7           | <i>R. rutilus lacustris</i> | 09.02.2018       | Ice                 | -               | 103              |
| RW8           | <i>R. rutilus lacustris</i> | 09.02.2018       | Ice                 | -               | 72               |

## Ser-PETA

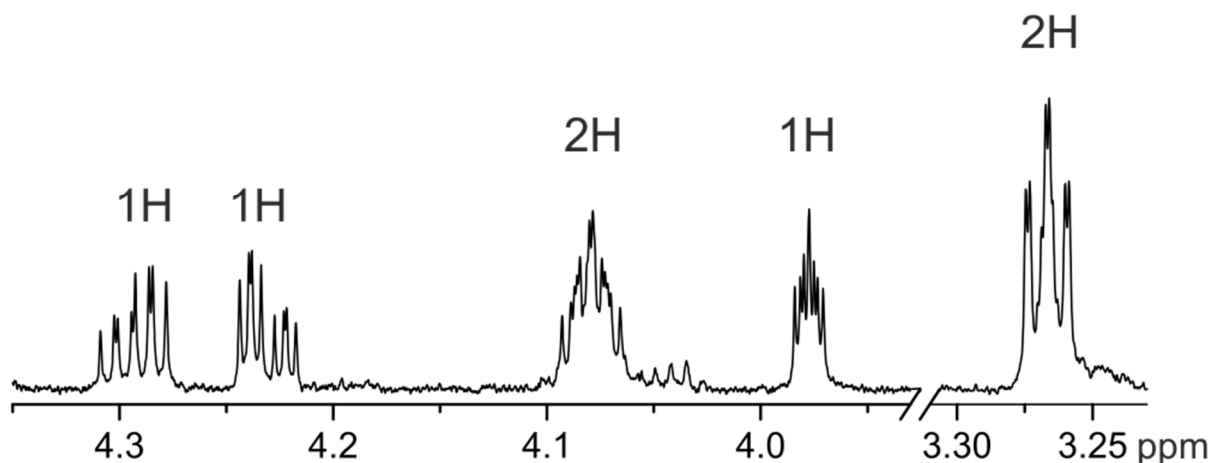

**Supplementary Figure S1.** NMR spectrum of serine phosphoethanolamine (Ser-PETA).  $^1\text{H}$  NMR (700 MHz,  $\text{D}_2\text{O}$ ): 3.267 (2H, m,  $\text{CH}_2$ ); 3.978 (1H, m, CH); 4.079 (2H, m,  $\text{CH}_2$ ); 4.23 (1H, m,  $\text{CH}_2$ ); 4.29 (1H, m,  $\text{CH}_2$ ).

## Thr-PETA

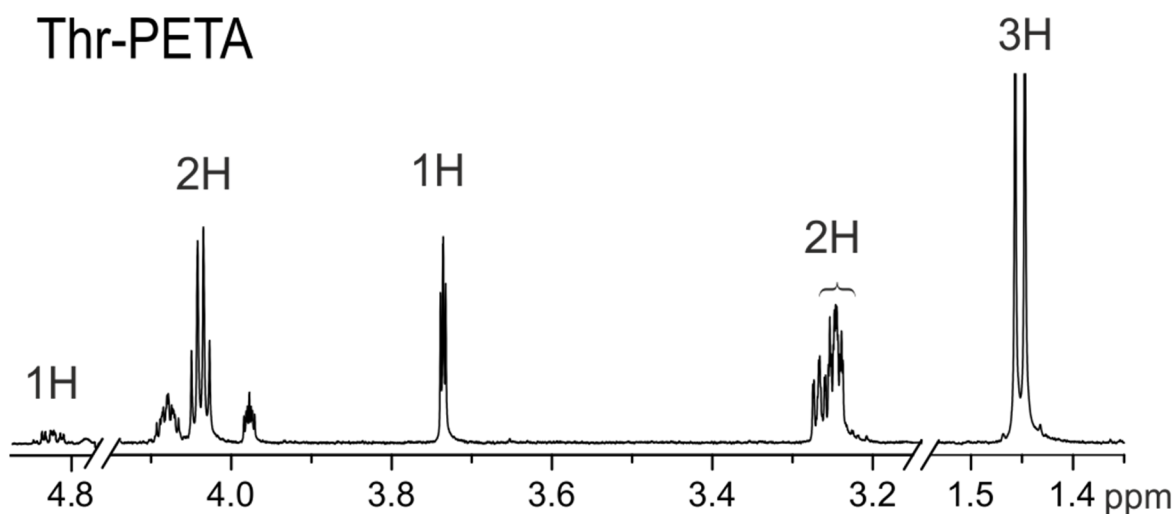

**Supplementary Figure S2.** NMR spectrum of threonine phosphoethanolamine (Thr-PETA).  $^1\text{H}$  NMR (700 MHz,  $\text{D}_2\text{O}$ ): 1.452 (3H, d,  $J = 6.7$  Hz,  $\text{CH}_3$ ); 3.247 (2H, m,  $\text{CH}_2$ ); 3.736 (1H, dd,  $J = 2.2, 2.5$  Hz, CH); 4.039 (2H, q,  $J = 5.3$  Hz,  $\text{CH}_2$ ); 4.820 (1H, m, CH). The intensity of the signal at 4.82 ppm is attenuated due to its proximity to water resonance suppressed by RF irradiation.

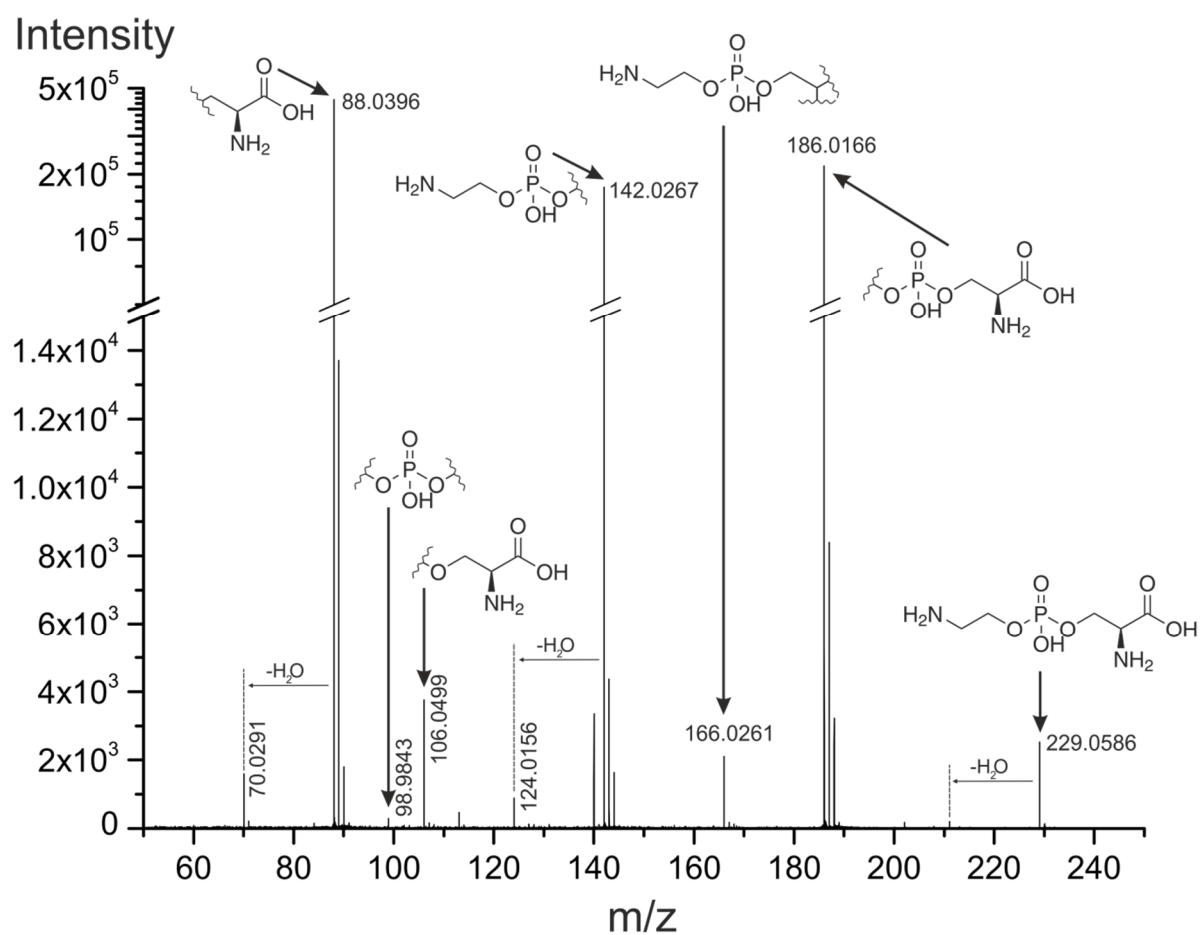

**Supplementary Figure S3.** ESI-Q-TOF mass-spectrum of CID fragments (MS/MS) of isolated parent ion with  $m/z$  229.0586 (Ser-PETA). Collision energy 35eV, positive ion mode. Wavy lines indicate the positions of the bond cleavage.

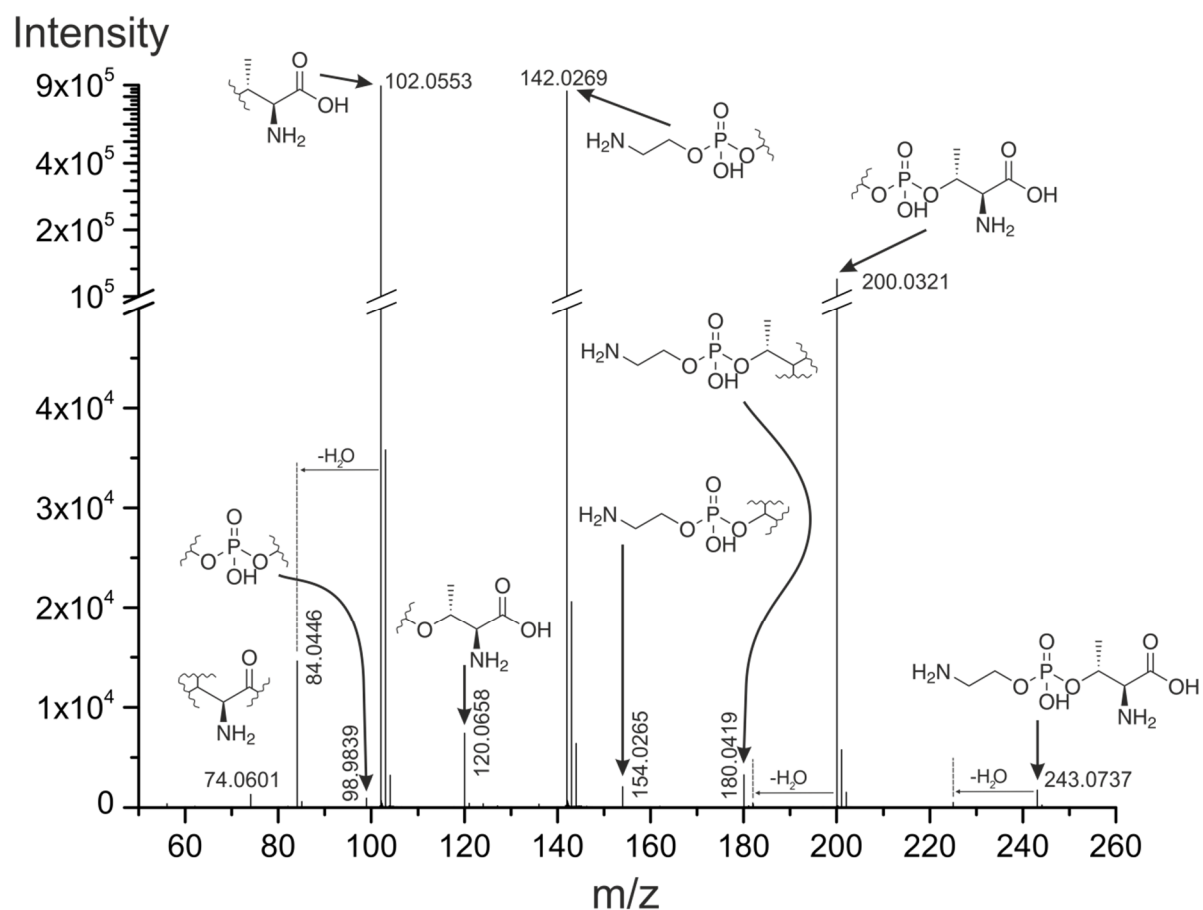

**Supplementary Figure S4.** ESI-Q-TOF mass-spectrum of CID fragments (MS/MS) of isolated parent ion with  $m/z$  243.0737 (Thr-PETA). Collision energy 35eV, positive ion mode. Wavy lines indicate the positions of the bond cleavage.
